# Supplementary material for: Liver condition of Holstein cows affects mitochondrial function and fertilization ability of oocytes
Source: PubMed Central journal article supplement — J Reprod Dev. 2016 Jan 30;62(3):235–40. doi: 10.1262/jrd.2015-143 (PMC4919286; doi:10.1262/jrd.2015-143), 2016-01-30
Supplement: jrd-62-235-s001.pdf [file jrd-62-235-s001.pdf]

**Supplementary Table 1.** Effect of supplementation of IVM medium with follicular fluid derived from HL or DL cows on mitochondrial function in oocytes

| FF groups | Mitochondrial membrane potential |                |                                                     | ATP content   |                |                         |
|-----------|----------------------------------|----------------|-----------------------------------------------------|---------------|----------------|-------------------------|
|           | No. of trials                    | No. of oocytes | Fluorescence intensity (Fold change, Mean $\pm$ SE) | No. of trials | No. of oocytes | ATP (pM, Mean $\pm$ SE) |
| HL        | 4                                | 26             | 1.00 $\pm$ 0.07                                     | 4             | 26             | 3.43 $\pm$ 0.10         |
| DL        | 4                                | 32             | 1.08 $\pm$ 0.07                                     | 4             | 32             | 3.39 $\pm$ 0.14         |

FF was collected from follicles 3–6 mm in diameter from individual DL and HL cows. Four DL and HL cows were used for FF preparation and four sets of HL DL-FFs were used for the experiment. COCs collected from HL cows were divided into two groups and matured for 21 h in medium containing 10% HL-FF or DL-FF, after which the mitochondrial membrane potential and ATP content in oocytes were measured. Membrane potential and ATP measurements are described in the Materials and method section.
